# Supplementary material
Source: PubMed Central journal article supplement (PMC5289922)
Supplement: NIHMS836912-supplement-supplement_1.pdf [file NIHMS836912-supplement-supplement_1.pdf]

## Supplements

### 1. Studies included in meta-analysis

- Ando, J., Ono, Y., & Wright, M. J. (2001). Genetic structure of spatial and verbal working memory. *Behavior Genetics, 31*, 615-624.
- Bouchard, T. J., Jr., Lykken, D. T., McGue, M., Segal, N. L., & Tellegen, A. (1990). Sources of human psychological differences: The Minnesota Twin Study of Twins Reared Apart. *Science, 250*, 223-228.
- Cox, A. J., Hugenschmidt, C. E., Raffield, L. M., Langefeld, C. D., Freedman, B. I., Williamson, J. D., . . . Bowden, D. W. (2014). Heritability and genetic association analysis of cognition in the Diabetes Heart Study. *Neurobiology of Aging, 35*, 1958.e1953-1958.e1912.
- Finkel, D., & McGue, M. (1993). The origins of individual differences in memory among the elderly: A behavior genetic analysis. *Psychology and Aging, 8*, 527-537.
- Finkel, D., & McGue, M. (1998). Age differences in the nature and origin of individual differences in memory. *International Journal of Aging and Human Development, 47*, 217-239.
- Finkel, D., & McGue, M. (2007). Genetic and environmental influences on intraindividual variability in reaction time. *Experimental Aging Research, 33*, 13-35.
- Finkel, D., & Pedersen, N. L. (2014). Genetic and environmental contributions to the association between intraindividual variability in reaction time and cognitive function. *Aging, Neuropsychology, and Cognition*.
- Finkel, D., Pedersen, N. L., McGue, M., & McClearn, G. E. (1995). Heritability of cognitive abilities in adult twins: Comparison of Minnesota and Swedish data. *Behavior Genetics, 25*, 421-431.
- Giubeli, F., Medda, M., Fagnani, C., Bianchi, V., De Carolis, A., Salvetti, M., . . . Stazi, M. A. (2008). Heritability of neurocognitive function in the elderly: Evidence from an Italian twin study. *Age and Ageing, 37*, 640-646.
- Glahn, D. C., Kent, J. W., Sprooten, E., Deigo, V. P., Winkler, A. M., Curran, J. E., . . . Blangero, J. (2013). Genetic basis of neurocognitive decline and reduced white-matter integrity in normal human brain aging. *PNAS*. doi: 10.1073/pnas.1313735110
- Greenwood, T. A., Beeri, M. S., Schmeidler, J., Valerio, D., Raventos, H., Mora-Villalobos, L., . . . Silverman, J. M. (2011). Heritability of cognitive functions in families of successful cognitive aging probands from the Central Valley of Costa Rica. *Journal of Alzheimer's Disease, 27*, 897-907.
- Hayakawa, K., Shimizu, T., Ohba, Y., & Tomioka, S. (1992). Risk factors for cognitive aging in adult twins. *Acta Geneticae Medicae Gemellologiae, 41*, 187-195.
- Johansson, B., Whitfield, K., Pedersen, N. L., Hofer, S. M., Ahern, F., & McClearn, G. E. (1999). Origins of individual differences in episodic memory in the oldest-old: A populationbased study of identical and same-sex fraternal twins aged 80 and older. *Journal of Gerontology: Psychological Sciences, 54B*, P173-P179.

- Kremen, W. K., Jacobson, K., Xian, H., Eisen, S. A., Waterman, B., Toomey, R., . . . Lyons, M. J. (2005). Heritability of word recognition in middle-aged men varies as a function of parental education. *Behavior Genetics, 35*, 417-433.
- Kremen, W. S., Panizzon, M. S., Franz, C. E., Spoon, K. M., Vuoksimaa, E., Jacobson, K., . . . Lyons, M. J. (2014). Genetic complexity of episodic memory: A twin approach to studies of aging. *Psychology and Aging, 29*, 404-417.
- Lee, T., Mosing, M. M., Henry, J. D., Trollor, J. N., Ames, D., Martin, N. G., . . . Sachdev, P. (2012). Genetic influences on four measures of executive functions and their covariation with general cognitive ability: The Older Australian Twins Study. *Behavior Genetics, 42*, 528-538.
- Malykh, S. B., Iskoldsky, N. V., & Gindina, E. D. (2005). Genetic analysis of IQ in young adulthood: A Russian twin study. *Personality and Individual Differences, 38*, 1475-1485.
- McClearn, G. E., Johansson, B., Berg, S., & Pedersen, N. L. (1997). Substantial genetic influences on cognitive abilities in twins 80 or more years old. *Science, 276*, 1560-1563.
- McGue, M., & Christensen, K. (2001). The heritability of cognitive function in very old adults: Evidence from Danish twins aged 75 years and older. *Psychology and Aging, 16*, 272-280.
- Neubauer, A. C., Spinath, F. M., Reimann, R., Angleitner, A., & Borkenau, P. (2000). Genetic and environmental influences on two measures of speed of information processing and their relation to psychometric intelligence: Evidence from the German Observational Study of Adult Twins. *Intelligence, 28*(4), 267-289.
- Pedersen, N. L., Plomin, R., Nesselrode, J. R., & McClearn, G. E. (1992). Quantitative genetic analysis of cognitive abilities during the second half of the lifespan. *Psychological Science, 3*, 346-353.
- Posthuma, D., de Geus, E. J. C., Boomsma, D. I., (2001)., & Behavior Genetics, 593-602. (2001). Perceptual speed and IQ are associated through common genetic factors. *Behavior Genetics, 31*, 593-602.
- Posthuma, D., Mulder, E. J. C. M., Boomsma, D. I., & de Geus, E. J. C. (2002). Genetic analysis of IQ, processing speed and stimulus-response incongruency effects. *Biological Psychology, 61*, 157-182.
- Singer, J. J., MacGregor, A. J., Cherkas, L. F., & Spector, T. D. (2006). Genetic influences on cognitive function using the Cambridge Neuropsychological Test Automated Battery. *Intelligence, 34*, 421-428.
- Swan, G. E., Carmelli, D., Reed, T., Harshfield, G. A., Fabsitz, R. R., & Eslinger, P. J. (1990). Heritability of cognitive performance in aging twins: The National Heart, Lung, and Blood Institute Twin Study. *Archives of Neurology, 47*, 259-262.
- Swan, G. E., Reed, T., Jack, L. M., Miller, B. L., Markee, T., Wolf, P. A., . . . Carmelli, D. (1999). Differential genetic influence for components of memory in aging adult twins. *Archives of Neurology, 56*, 1127-1132.
- Tambs, K., Sundet, J. M., & Magnus, P. (1984). Heritability analysis of WAIS subtests: A study of twins. *Intelligence, 8*, 283-293.

## 2. Supplemental Tables

Supplemental table 1. Fit statistics (-2LL) of meta-analysis of heritability.

| Domain             | Intercept only | Linear             | Quadratic          | 3-slope            |
|--------------------|----------------|--------------------|--------------------|--------------------|
| Verbal             | 304.7          | 299.6 <sup>a</sup> | 293.2 <sup>b</sup> |                    |
| Spatial            | 161.3          | 161.3              | 160.3              |                    |
| General Memory     | 372.2          | 370.9              | 369.1              |                    |
| Speed              | 228.3          | 227.7              | 227.3              |                    |
| Working Memory     | 229.1          | 228.9              | 228.8              |                    |
| Executive Function | 197.8          | 197.4              | 196.4              | 192.6 <sup>c</sup> |

<sup>a</sup> Model fit is significantly different from intercept only model at  $p < .05$

<sup>b</sup> Model fit is significantly different from linear model at  $p < .05$

<sup>c</sup> Model fit is marginally significantly different from linear model at  $p < .10$

Supplemental table 2. Parameter estimates (standard errors) of meta-analysis of heritability.

| Domain             | Quadratic Model |               |                  | 3-Slope Model |               |              |               |
|--------------------|-----------------|---------------|------------------|---------------|---------------|--------------|---------------|
|                    | Intercept       | Slope         | Quad             | Intercept     | Slope 20-50   | Slope 50-65  | Slope 65-90   |
| Verbal             | 0.54 (.039)     | -0.007 (.003) | -0.00014 (.0001) |               |               |              |               |
| Spatial            | 0.59 (.068)     | -0.004 (.004) | -0.00015 (.0001) |               |               |              |               |
| General Memory     | 0.45 (.042)     | -0.002 (.003) | -0.00015 (.0001) |               |               |              |               |
| Speed              | 0.39 (.073)     | 0.008 (.005)  | 0.00016 (.0002)  |               |               |              |               |
| Working Memory     | 0.39 (.053)     | -0.002 (.003) | -0.00006 (.0002) |               |               |              |               |
| Executive Function | 0.50 (.063)     | 0.006 (.007)  | 0.00021 (.0002)  | 0.26 (.155)   | -0.013 (.007) | 0.021 (.010) | -0.013 (.014) |

\* Note: intercept of quadratic model is at age 65; intercept of 3-slope model is at age 50.

Supplemental table 3. Fit statistics and criteria: meta analysis of MZ/DZ correlation ratios.

| Domain                          | Unconditional<br>(parms=3) |      | Age & Age <sup>2</sup><br>(parms=5 <sup>a</sup> ) |      | Age & Age <sup>2</sup> ,<br>between study=0<br>(parms=4 <sup>a</sup> ) |      |
|---------------------------------|----------------------------|------|---------------------------------------------------|------|------------------------------------------------------------------------|------|
|                                 | -2LL                       | AIC  | -2LL                                              | AIC  | -2LL                                                                   | AIC  |
| Verbal                          | 22.3                       | 28.3 | 19.3                                              | 29.3 | 19.4                                                                   | 27.4 |
| Spatial                         | 5.6                        | 11.6 | 5.4                                               | 15.4 | 5.4                                                                    | 13.4 |
| General Memory                  | 36.0                       | 42.0 | 34.7                                              | 44.7 | 35.1                                                                   | 43.1 |
| Speed                           | 18.5                       | 24.5 | 15.3                                              | 25.3 | 15.3                                                                   | 23.3 |
| Working Memory                  | 23.7                       | 29.7 | 21.4                                              | 31.4 | 21.5                                                                   | 29.5 |
| Executive Function <sup>a</sup> | 2.6                        | 8.6  | 0.8                                               | 8.8  | 0.8                                                                    | 6.8  |

a. Only Linear Age entered for Executive Function, hence the number of parameters for the age models is one fewer.
